# Supplementary material for: Antibiotic Treatment during Gestation Enhances Susceptibility to Mycobacterium tuberculosis in Offspring
Source: PubMed Central journal article supplement (PMC9769670; doi:10.1128/spectrum.02491-22), 2022-10-31
Supplement: spectrum.02491-22-s0001.pdf [file spectrum.02491-22-s0001.pdf]

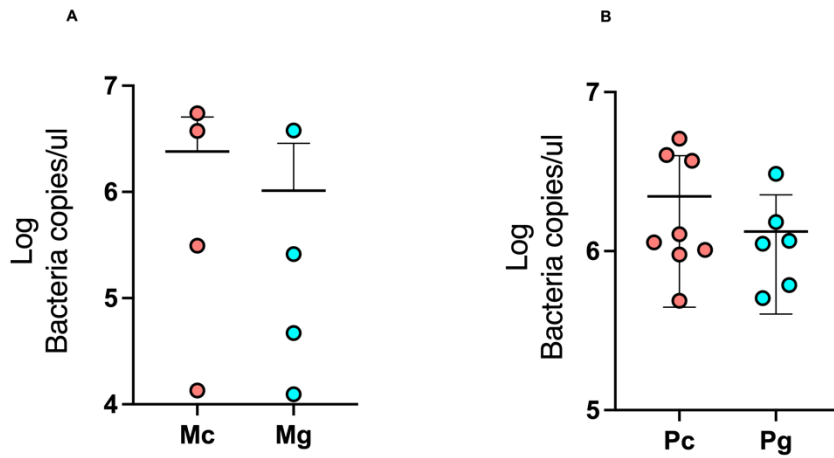

**Figure S1: BactQuant analyses of bacteria load in dams and pups. (A)** Bacteria load in Mc and Mg dams during pregnancy (gestation day 20) **(B)** Bacterial load in Pc and Pg pups at postnatal day 14. Data shown as mean  $\pm$  SD. **Related to Figure 1.**

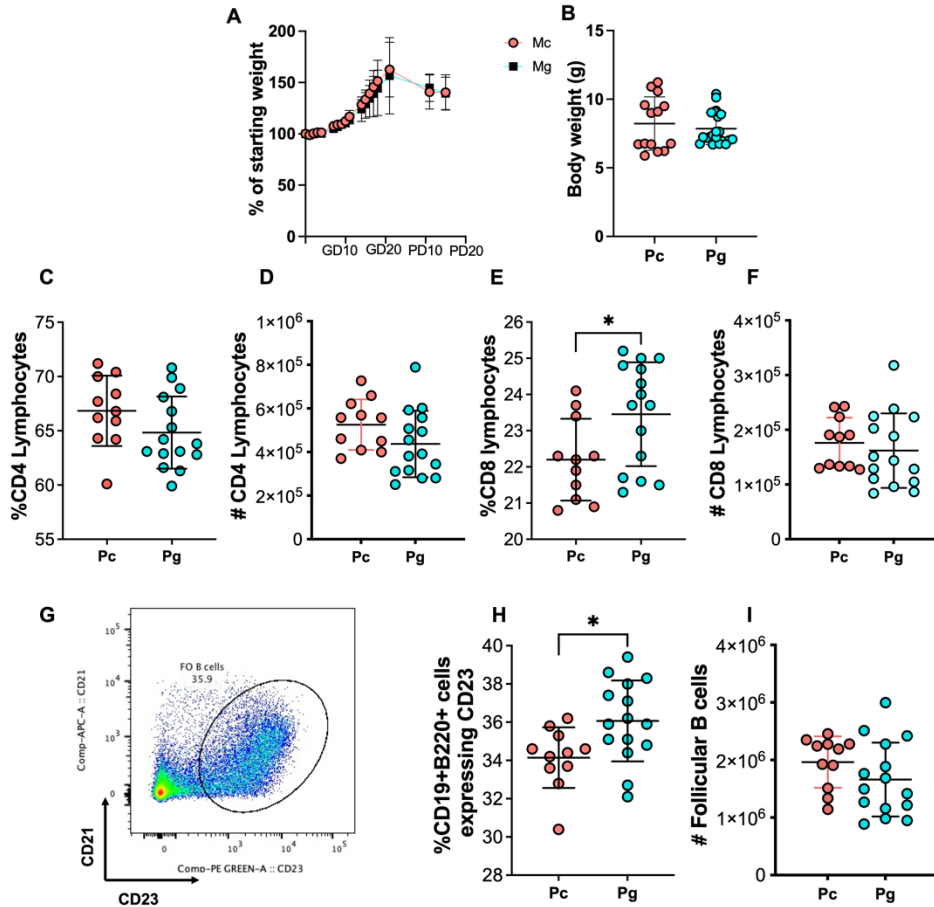

**Figure S2: Body weights and Inherent immunity in pups spleens day 14 postpartum. (A)** Body weight of dams during gestation and at postnatal day 10 and 14. **(B)** Pups body weight at postnatal day 14. **(C-D)** Frequency and numbers of CD4+ T cells. **(E-F)** Frequency and numbers of CD8+ T cells. **(G)** Representative flow plot of Follicular B cells (CD19+B220+CD23+). **(H-I)** Frequency and number of Follicular B cells. Shown as mean  $\pm$  SD. Data are combined from two independent experiments. n=11-21 per group for pups and 6 per group for dams. \*p < 0.05. **Related to Figure 2.**

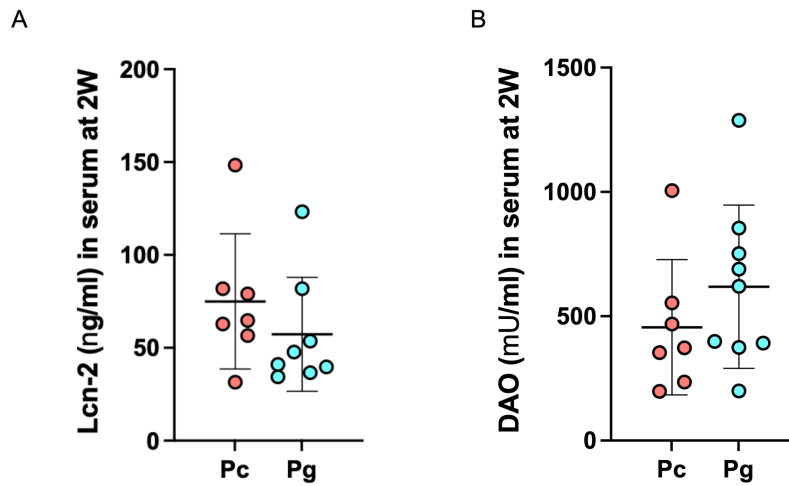

**Figure S3: Inflammation and intestinal injury in pups.** We measured markers of systemic inflammation or intestinal mucosal injury in pups serum at day 14 of life. **(A)** Concentrations of Lipocalin-2 in serum. **(B)** Concentrations of Diamine Oxidase in serum. Graphs are shown as mean  $\pm$  SD. N= 7-8 per group. **Related to Figure 2.**
